# Supplementary material
Source: PubMed Central journal article supplement (PMC4070273)

# **Auto-TT: Automated Detection and Analysis of T-Tubule Architecture in Cardiomyocytes**

Ang Guo and Long-Sheng Song\*

Division of Cardiovascular Medicine, Department of Internal Medicine and Francois M. Abboud  
Cardiovascular Research Center, Carver College of Medicine, University of Iowa, Iowa City, Iowa

# Supplemental Materials

## Figure Legends

**Figure S1. Annotated AutoTT application graphic user interface.**

**Figure S2. About morphological operations.**

For detailed definition of morphological operations, please refer to Gonzalez, R. C., R. E. Woods, and S. L. Eddins, *Digital Image Processing Using MATLAB*, Gatesmark Publishing, 2009.

Morphological operations are based on two fundamental operations: erosion and dilation.

Rule for Erosion: The value of the output pixel is the minimum value of all the pixels in the input pixel's neighborhood. The neighborhood is defined by the structuring element.

Rule for Dilation: The value of the output pixel is the maximum value of all the pixels in the input pixel's neighborhood. The neighborhood is defined by the structuring element.

A structuring element is a matrix consisting of only 0's and 1's that can have any arbitrary shape and size. The pixels with values of 1 define the neighborhood.

Morphological opening is erosion followed by dilation using the same structuring element. For binary images, the shape of large objects that can completely contain the applied structuring element will be captured, while the small objects that can't completely contain the structuring element will be removed. For a grayscale image, the values of pixels with higher contrast to neighborhood defined by structuring elements are less likely to be kept by morphological opening. As a result, morphological opening can be used to detect background when small structures are object of interest.

Morphological closing is dilation followed by erosion using the same structuring elements. For binary images, this operation can fill the gaps that can't completely contain the structuring elements.

In the following simplified example, the vertically and horizontal originated bands schematically represent Transverse elements (TE) and Longitudinal elements (LE) respectively. Both TE and LE are 5 pixels wide. Note that the background illumination is artificially made to be brighter on the right of the image than on the left. If the task is to subtract the spatially uneven background illumination, morphological opening with a structuring element in shape of 7 pixels \* 7 pixels square is applied to the Image A. Given the TE and LE are 5-pixels wide, they cannot completely cover the 7 pixels\*7 pixels square. Therefore these objects are not detected by morphological opening. Image B is the background detected by morphological opening. Note the spatial heterogeneity of the background detected by the algorithm. Subtraction of B from A results in objects of interest (C) with relatively even and low background.

Subtraction of background while preserving both TE and LE can also be achieved by morphological opening with 'X' shaped structuring elements that cannot be contained in the objects of interest. The resultant images show the successful separation of background (D) and objects of interest (E).

If the task is to separate TE and LE, morphological opening with horizontal line-shaped structuring element can be applied. The length of the line is set to 7-pixels, so LE completely contain the structuring element such that only LE are detected by this operation. Subtraction of LE (F) from input results in TE (G).

**Figure S3. Several image processing steps** not shown in Figure 1. **A**, Cell image before ROI selection. **B** and **C**, Separation of intracellular region (B) and other parts of a cell image (C). **D**, Extracted global T-tubule system by subtracting background. **E**, Skeletalized global T-tubules. **F** and **G**, Separation of Transverse Elements (TE, F) and Longitudinal Elements (LE, G).

**Figure S4. Global thresholding results in very different estimation of the T-tubule density when different thresholds are applied to a same image.**

# Supplemental Figure S1

## Step 1: Setup the parameters for analysis

**Setup Parameters**

|                                      |      |
|--------------------------------------|------|
| Pixel Size X (um)                    | 0.14 |
| Pixel Size Y (um)                    | 0.14 |
| FFT X length (pixels)                | 1024 |
| FFT Y length (pixels)                | 1024 |
| Approximate Tubule Diameter (pixels) | 5    |
| 2D peak detection boxbtmfrac         | 0.02 |
| 2D peak detection boxhghtfrac        | 0.01 |
| 2D peak detection pkhghtfrac         | 1    |

Users need to specify the physical scales represented by a pixel in the images if they want to know the correct averaged T-tubule or Sarcomere spacing.

Users can determine the size of images subjected to 2D-FFT. By default, both sizes are set to be the maximum size of the image being analyzed.

Users must estimate how many pixels are covered by the width of imaged T-Tubules. Users may estimate this parameter by zoom in the images.

Set up the parameter for 2D peak detection. The default values for these parameters can do the job under most conditions.

Users can use this function to store their customized parameters into a .dat file.

Users can use this function to load their customized parameters saved in a .dat file.

## Step 2: Perform the analyses

**Tubule analysis**

Predefined Region of Interest

BlockSize for ROI:

Intensity Threshold for ROI:

Global Intensity Threshold:  =  %

Analysis Options:

**Sarcomere analysis**

Intensity Threshold:

Open the image to be analyzed

Check this box only when analyzing pre-defined Region of Interest.

Adjust these two parameters to determine the Region of Interest (ROI).

This parameter enables users to preprocess the image by Global Thresholding.

Here will show the percentile of the global intensity threshold among all the pixels whose intensity is non-zero in the selected image.

Changing anyone of these two parameters will automatically update the other one according to the pixel intensity histogram of the current image.

Intensity threshold for sarcomere analysis.

Analyze architecture of sarcomere.

Analyze Global T-tubule.

Analyze Transverse element only.

## Step 3: Outputs will be displayed in this panel

**Outputs**

|                                     |                                        |
|-------------------------------------|----------------------------------------|
| Intracellular Area (pixels)         | <input type="text" value="Edit Text"/> |
| T-element Density (%)               | <input type="text" value="Edit Text"/> |
| L-element Density (%)               | <input type="text" value="Edit Text"/> |
| Regularity                          | <input type="text" value="Edit Text"/> |
| T-element or Sarcomere Spacing (um) | <input type="text" value="Edit Text"/> |
| Index of TT integrity (TTint)       | <input type="text" value="Edit Text"/> |

Export the displayed outputs into a file named outputs.dat in the same fold of the image analyzed.

Clear outputs displayed in this panel.

# Supplemental Figure S2

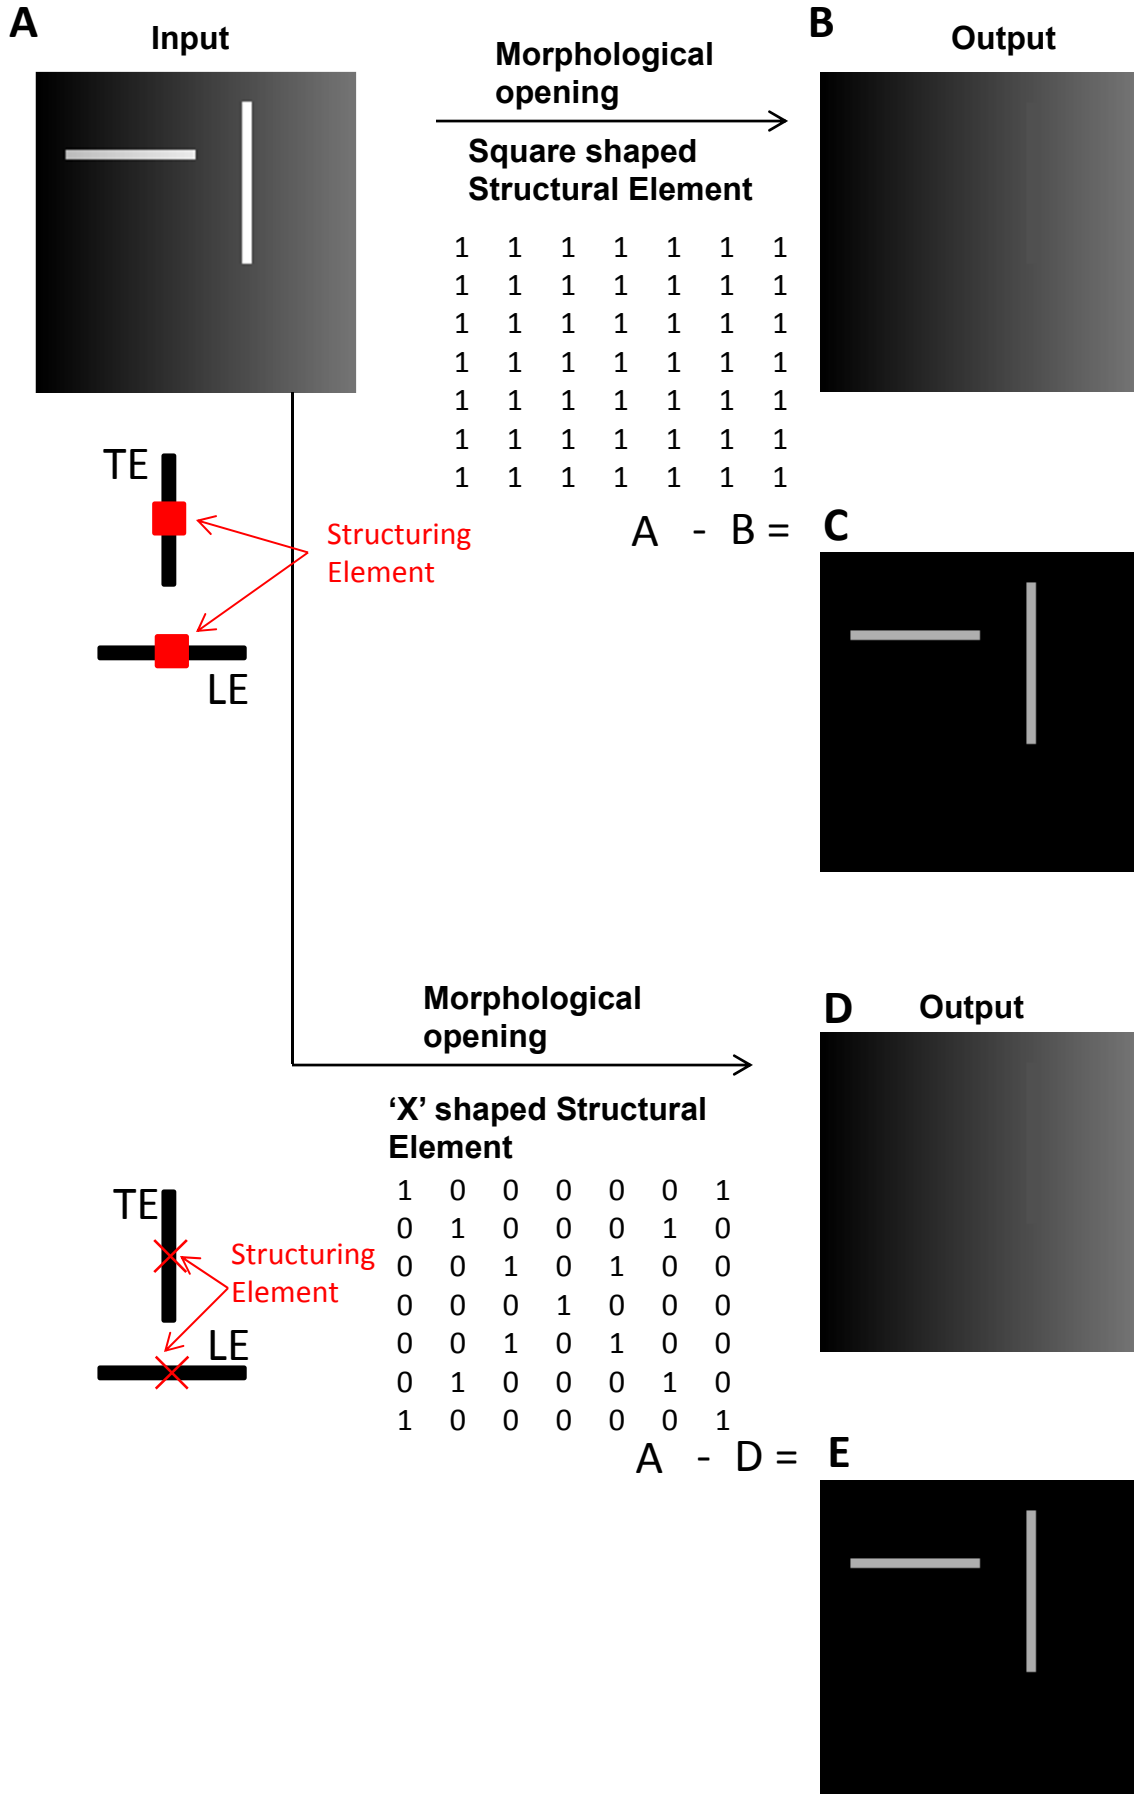

**E** Input

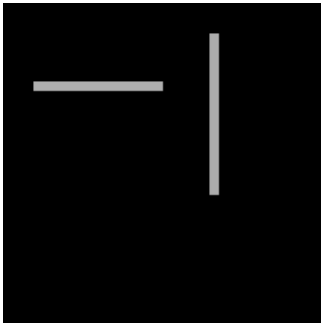

Morphological opening

Horizontal line shaped  
Structural Element

1 1 1 1 1 1 1

**F** Output

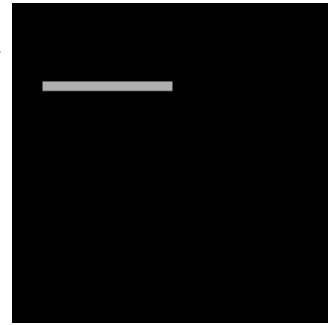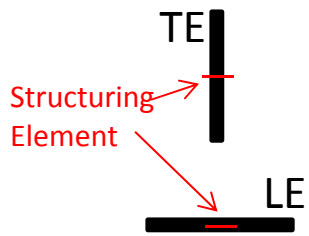

$E - F = G$

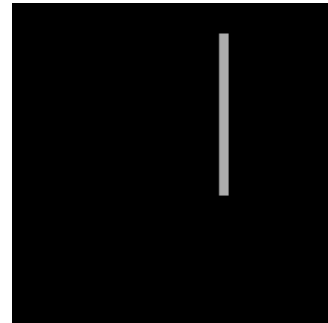

# Supplemental Figure S3

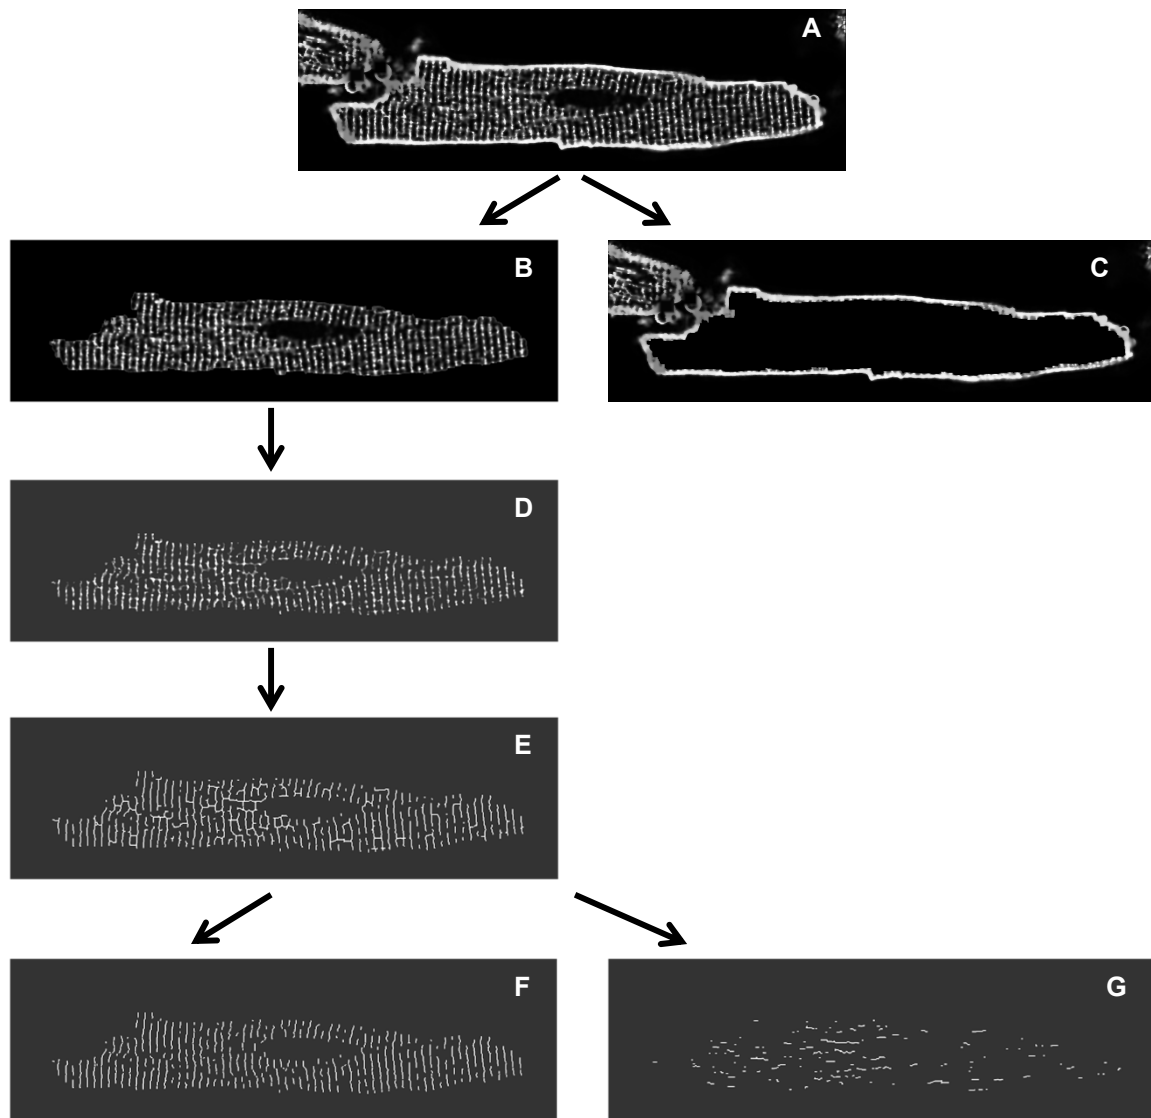

# Supplemental Figure S4

Original gray scale image

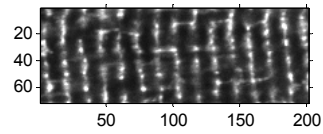

Binary image

Threshold = 100  
T-Tubule area = 3450 pixels

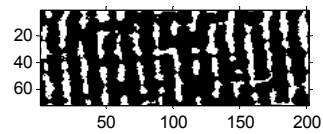

Threshold = 120  
T-Tubule area = 2442 pixels

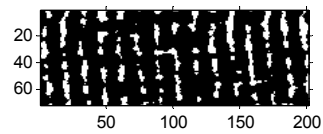

Supplement: mmc1.pdf [file mmc1.pdf]
